# Supplementary material for: Highly graphitic porous carbon preparedviaK2FeO4-assisted KOH activation for supercapacitors
Source: Royal Society of Chemistry journal article supplement (doi:10.1039/d2nj02150a), 2022-01-01
Supplement: d2nj02150a1.pdf [file d2nj02150a1.pdf]

## High graphitic porous carbon prepared via $K_2FeO_4$ -assisted KOH activation for supercapacitors

Yongtao Tan<sup>1\*</sup>, Jining Ren<sup>1</sup>, Xiaoming Li<sup>2</sup>, Lijun He<sup>1</sup>, Chengmeng Chen<sup>2</sup>, Haibo Li<sup>1</sup>

<sup>1</sup> Ningxia Key Laboratory of Photovoltaic Materials, School of Materials and New Energy,

Ningxia University, Yinchuan, 750021, P. R. China

<sup>2</sup> Key Laboratory of Carbon Materials, Institute of Coal Chemistry, Chinese Academy of Sciences,

Taiyuan 030001, China

Corresponding author: Yongtao Tan (tanyt0124@163.com; or tanyt0124@nxu.edu.cn)

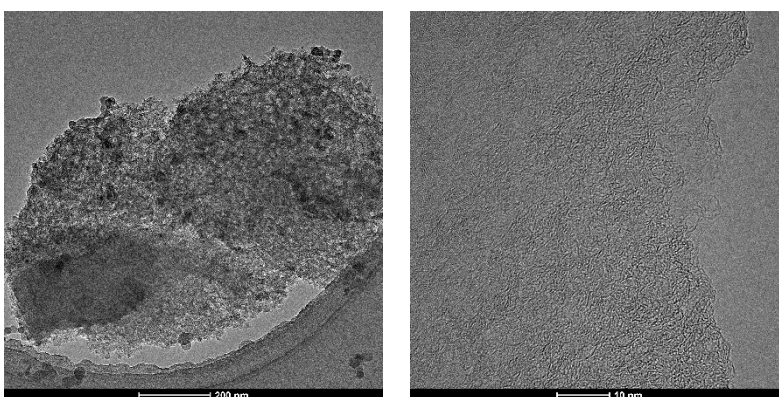

Fig. S1 TEM images of PC-KOH+ $K_2FeO_4$

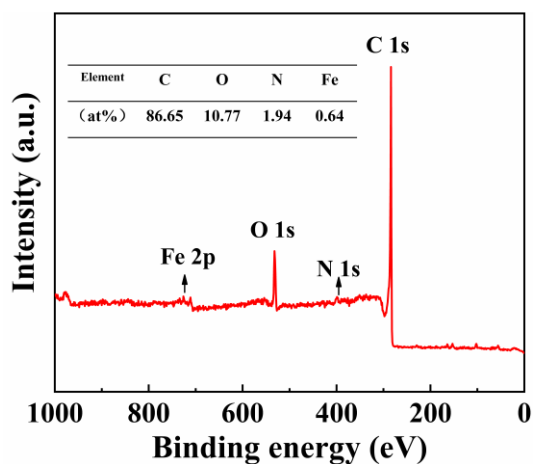

Fig.S2 XPS survey spectrum

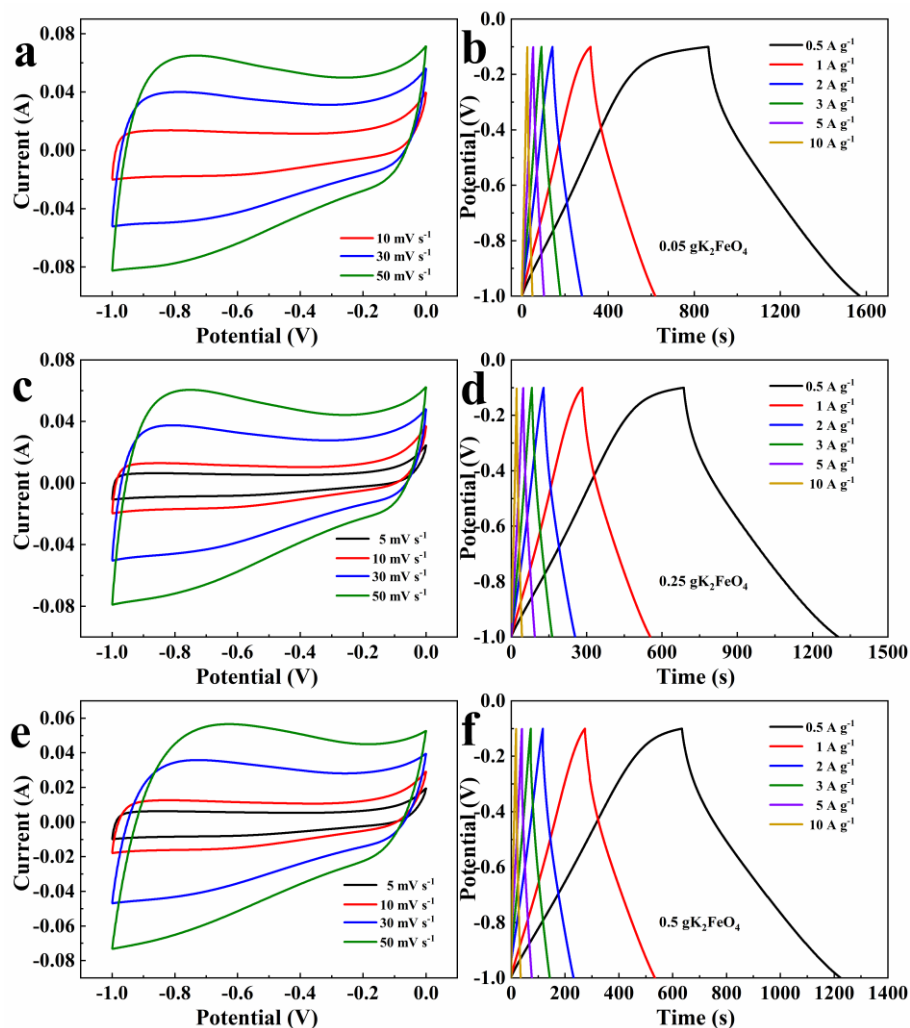

**Fig.S3** Electrochemical performances of PC-KOH+K<sub>2</sub>FeO<sub>4</sub> at loading different K<sub>2</sub>FeO<sub>4</sub> addition: (a) CV curves and (b) GCD curves of loading (a,b) 0.05 g K<sub>2</sub>FeO<sub>4</sub>, (c,d) 0.25 g K<sub>2</sub>FeO<sub>4</sub>, (e,f) 0.5 g K<sub>2</sub>FeO<sub>4</sub>

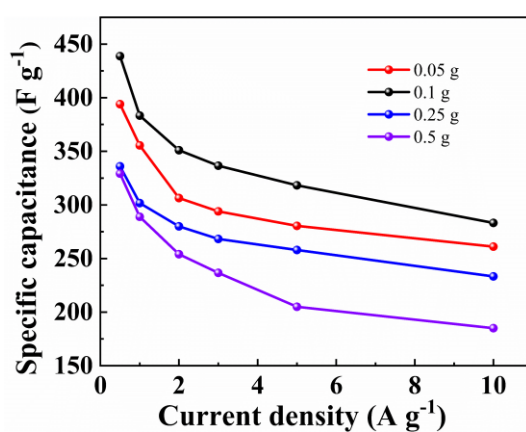

**Fig.S4** Specific capacitance of different loading mass of K<sub>2</sub>FeO<sub>4</sub>

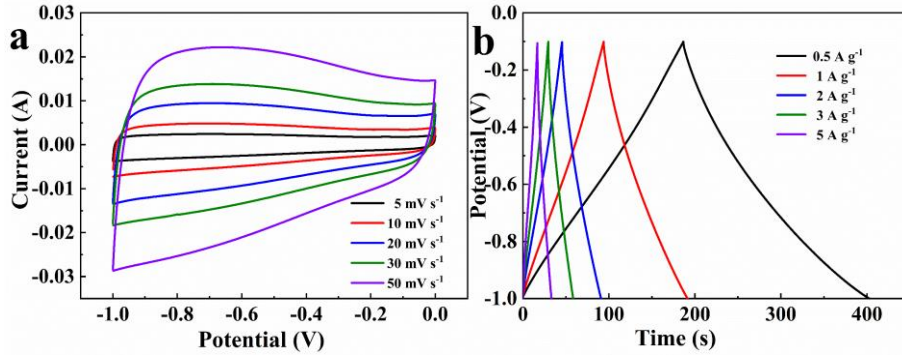

Fig.S5 Electrochemical performances of PC-Non: (a) CV curves, (b) GCD curves

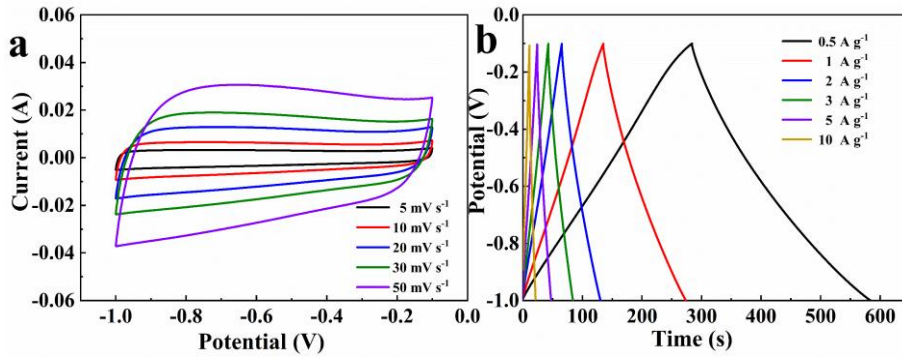

Fig.S6 Electrochemical performances of PC-K<sub>2</sub>FeO<sub>4</sub>: (a) CV curves, (b) GCD curves

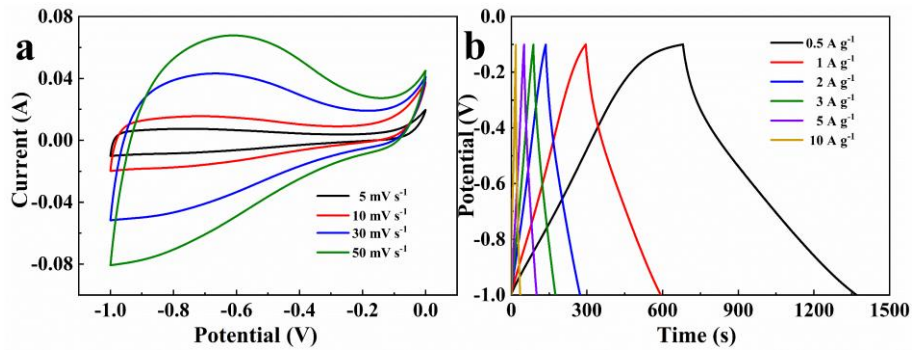

Fig.S7 Electrochemical performances of PC-KOH: (a) CV curves, (b) GCD curves

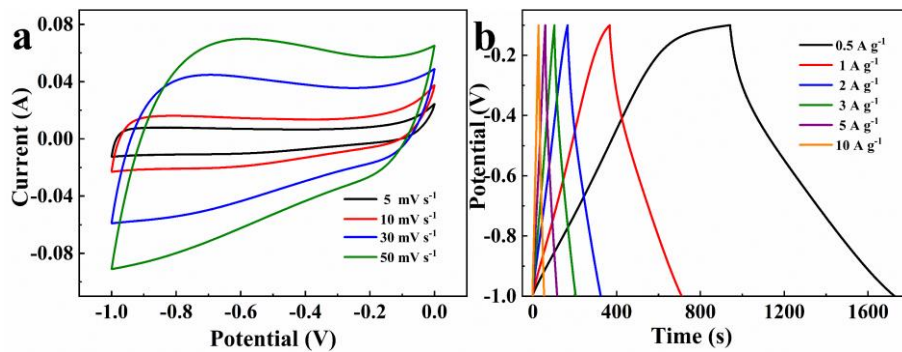

Fig.S8 Electrochemical performances of PC-KOH+K<sub>2</sub>FeO<sub>4</sub>: (a) CV curves, (b) GCD curves at 700 °C

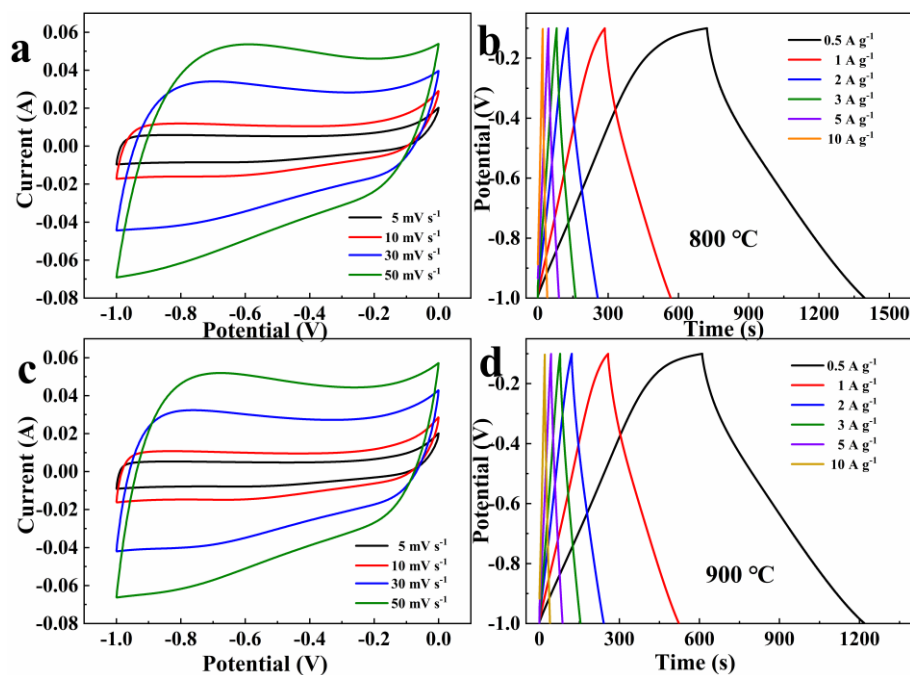

**Fig.S9** Electrochemical performances of PC-KOH+K<sub>2</sub>FeO<sub>4</sub> at different temperatures: (a) CV curves and (b) GCD curves of PC-KOH+K<sub>2</sub>FeO<sub>4</sub> at 800 °C, (c) CV curves and (d) GCD curves of PC-KOH+K<sub>2</sub>FeO<sub>4</sub> at 900 °C

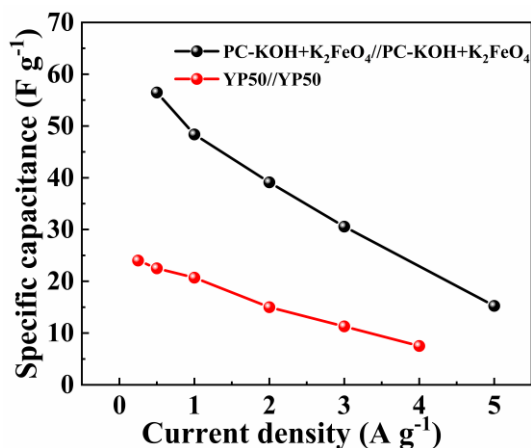

**Fig.S10** Specific capacitances at different current densities of supercapacitor devices

**Table. S1** Summary of energy densities of different devices in reported literature

| The device                                                                     | Energy density<br>(Wh kg <sup>-1</sup> ) | Power density<br>(W kg <sup>-1</sup> ) | Ref              |
|--------------------------------------------------------------------------------|------------------------------------------|----------------------------------------|------------------|
| PC-KOH+K <sub>2</sub> FeO <sub>4</sub> //PC-OH+K <sub>2</sub> FeO <sub>4</sub> | 19.9                                     | 398                                    | <b>This work</b> |
| YP50//YP50                                                                     | 8.17                                     | 205.8                                  | /                |
| ONEPC//ONEPC                                                                   | 9.02                                     | 499.6                                  | [1]              |
| N-HNC//N-HNC                                                                   | 15.5                                     | 500                                    | [2]              |
| N-BPC//N-BPC                                                                   | 16.75                                    | 150                                    | [3]              |
| N-CNF//N-CNF                                                                   | 17.9                                     | 850                                    | [4]              |

## References

- [1] G. Lin, R. Ma, Z. Yao, L. Qian, J. Wang, KOH activation of biomass-derived nitrogen-doped carbons for supercapacitor and electrocatalytic oxygen reduction, **Electrochimica Acta**, 261 (2017) 49-57.
- [2] Z. Shang, X. An, H. Zhang, M. Shen, F. Baker, Y. Liu, L. Liu, J. Yang, H. Cao, Q. Xu, H. Liu, Y. Ni, Houttuynia-derived nitrogen-doped hierarchically porous carbon for high-performance supercapacitor, **Carbon**, 161 (2020) 62-70.
- [3] K. Zhang, M. Liu, M. Si, Z. Wang, S. Zhuo, L. Chai, Y. Shi, Polyhydroxyalkanoate-Modified Bacterium Regulates Biomass Structure and Promotes Synthesis of Carbon Materials for High-Performance Supercapacitors, **ChemSusChem**, 12 (2019) 1732-1742.
- [4] Y. An, Y. Yang, Z. Hu, B. Guo, X. Wang, X. Yang, Q. Zhang, H. Wu, High-performance symmetric supercapacitors based on carbon nanosheets framework with graphene hydrogel architecture derived from cellulose acetate, **Journal of Power Sources**, 337 (2017) 45-53.
